# Supplementary material
Source: PubMed Central journal article supplement (PMC6887116)

## Supplemental Figures and Tables:

**Supplemental Table 1.** Long-term rates, time to development, and management of new or worsened hypertension (HTN) during ibrutinib therapy.

| <b>Final HTN status (n=562)</b>         | <b>n (%)</b>                                                   |
|-----------------------------------------|----------------------------------------------------------------|
| New or worsened HTN                     | 440 (78.3)                                                     |
| <b>Months post-ibrutinib initiation</b> | <b>Cumulative Incidence of new or worsened HTN, % (95% CI)</b> |
| 1                                       | 39.9 (35.8 - 43.9)                                             |
| 3                                       | 57.9 (53.7 - 61.8)                                             |
| 6                                       | 64.0 (59.9 - 67.8)                                             |
| 12                                      | 70.2 (66.8 - 74.3)                                             |
| <b>Group</b>                            | <b>Time to 50% cumulative incidence of HTN, months</b>         |
| All patients (n=562)                    | 1.8                                                            |
| New HTN (n=215)                         | 4.2                                                            |
| Worsened HTN (n=347)                    | 1.1                                                            |
| <b>By baseline HTN status</b>           |                                                                |
| <b>No baseline HTN (n=215)</b>          |                                                                |
| New HTN                                 | 154 (71.6)                                                     |
| <b>Baseline HTN (n=347)</b>             |                                                                |
| Worsened HTN                            | 286 (82.4)                                                     |
| Worsened CTCAE grade                    | 268 (77.2)                                                     |
| New antihypertensive added              | 158 (45.5)                                                     |
| Increased antihypertensive dose(s)      | 28 (8.1)                                                       |

Abbreviations: CTCAE, Common Terminology Criteria for Adverse Events.

**Supplemental Table 2.** Distribution of maximum SBP increase from baseline, %\*

| <b>Maximum SBP Increase from Baseline, mmHg</b> | <b>Total (n=562)</b> | <b>No baseline HTN (n=215)</b> | <b>Baseline HTN (n=347)</b> |
|-------------------------------------------------|----------------------|--------------------------------|-----------------------------|
| ≤ 0                                             | 6.2                  | 5.2                            | 6.8                         |
| >0 – 5                                          | 4.5                  | 1.4                            | 6.5                         |
| >5 – 10                                         | 8.3                  | 7.5                            | 8.9                         |
| >10 – 15                                        | 7.4                  | 8.9                            | 6.5                         |
| >15 – 20                                        | 7.3                  | 6.1                            | 8.0                         |
| >20 – 25                                        | 9.6                  | 8.9                            | 10.0                        |
| >25 – 30                                        | 11.6                 | 15.5                           | 9.1                         |
| >30 – 35                                        | 10.1                 | 9.4                            | 10.6                        |
| >35 – 40                                        | 9.1                  | 8.5                            | 9.4                         |
| >40 – 45                                        | 7.4                  | 8.0                            | 7.1                         |

|          |      |      |     |
|----------|------|------|-----|
| >45 – 50 | 7.6  | 8.0  | 7.4 |
| >50      | 10.9 | 12.7 | 9.7 |

\*Column totals = 100%

**Supplemental Table 3A.** Univariable predictors for the development of new or worsened hypertension (n=562).

| Variable                      | Hazard Ratio | 95% Confidence Interval | p-value                 |
|-------------------------------|--------------|-------------------------|-------------------------|
| Age*                          | 1.01         | (1.00 – 1.02)           | <b>0.01</b>             |
| Age (ref: 23-49)              |              |                         | <b>0.03<sup>†</sup></b> |
| 50-59                         | 0.86         | (0.60 - 1.22)           | 0.40                    |
| 60-69                         | 1.20         | (0.87 - 1.67)           | 0.26                    |
| ≥70                           | 1.20         | (0.85 - 1.67)           | 0.30                    |
| BMI*                          | 1.02         | (1.00 – 1.04)           | <b>0.04</b>             |
| BMI (ref: <25)                |              |                         | <b>0.04<sup>†</sup></b> |
| 25-29.9                       | 1.16         | (0.94 - 1.44)           | 0.17                    |
| ≥30                           | 1.37         | (1.07 - 1.74)           | <b>0.01</b>             |
| Male                          | 1.21         | (0.98 - 1.49)           | 0.07                    |
| Smoking (reference: Never)    |              |                         | 0.22 <sup>†</sup>       |
| Previous                      | 1.07         | (0.89 - 1.30)           | 0.47                    |
| Current                       | 1.48         | (0.94 - 2.32)           | 0.09                    |
| Black/African-American        | 1.15         | (0.71 - 1.86)           | 0.58                    |
| Primary malignancy            |              |                         | <b>0.04<sup>†</sup></b> |
| CLL vs. MCL                   | 1.03         | (0.71 – 1.48)           | 0.89                    |
| CLL vs. Other <sup>‡</sup>    | 1.49         | (1.09 – 2.02)           | <b>0.01</b>             |
| MCL vs. Other <sup>‡</sup>    | 1.45         | (0.92 – 2.29)           | 0.11                    |
| RAI stage (ref: 0/1)          |              |                         | 0.17 <sup>†</sup>       |
| 2                             | 1.14         | (0.78 – 1.67)           | 0.51                    |
| 3                             | 0.82         | (0.56 – 1.22)           | 0.33                    |
| 4                             | 0.60         | (0.63 – 1.30)           | 0.28                    |
| Statin                        | 1.08         | (0.88 - 1.34)           | 0.47                    |
| ASA                           | 1.09         | (0.88 - 1.35)           | 0.40                    |
| Prior DM                      | 1.44         | (1.11 - 1.86)           | <b>0.01</b>             |
| Prior MI                      | 0.94         | (0.66 - 1.34)           | 0.73                    |
| Prior CAD                     | 1.18         | (0.96 - 1.44)           | 0.12                    |
| Prior CHF                     | 1.24         | (0.97 - 1.59)           | 0.09                    |
| Prior CKD                     | 1.09         | (0.87 - 1.38)           | 0.44                    |
| Prior CVA                     | 1.02         | (0.67 - 1.54)           | 0.93                    |
| Corticosteroid use            | 1.16         | (0.84 - 1.61)           | 0.37                    |
| SNRI use                      | 1.41         | (0.93 - 2.14)           | 0.11                    |
| Estrogen and/or Progestin use | 0.84         | (0.60 - 1.17)           | 0.30                    |
| Bupropion use                 | 0.72         | (0.55 - 0.93)           | <b>0.01</b>             |
| ECOG (reference = 0)          |              |                         | 0.94 <sup>†</sup>       |
| 1                             | 1.00         | (0.82 - 1.20)           | 0.96                    |
| 2 to 4                        | 0.86         | (0.55 - 1.36)           | 0.52                    |
| Unknown                       | 0.96         | (0.37 - 2.49)           | 0.94                    |

| Variable                                | Hazard Ratio | 95% Confidence Interval | p-value                  |
|-----------------------------------------|--------------|-------------------------|--------------------------|
| CY3PA4 Inhibitor                        | 1.46         | (0.98 - 2.18)           | 0.06                     |
| Concomitant Therapy, any                | 1.06         | (0.87 - 1.31)           | 0.55                     |
| Concomitant Anthracycline               | 2.24         | (1.29 - 3.92)           | <b>0.004</b>             |
| Concomitant Cytotoxic Chemotherapy      | 1.06         | (0.87 - 1.31)           | 0.55                     |
| Concomitant Monoclonal Antibody         | 1.20         | (0.96 - 1.49)           | 0.11                     |
| Concomitant Targeted Therapy            | 1.06         | (0.67 - 1.69)           | 0.81                     |
| Concomitant Immunomodulatory            | 0.73         | (0.44 - 1.24)           | 0.25                     |
| Baseline SBP, mmHg (reference: <100)    |              |                         | <b>0.002<sup>†</sup></b> |
| 100-119                                 | 3.29         | (1.60 - 6.76)           | <b>0.001</b>             |
| 120-129                                 | 3.15         | (1.52 - 6.52)           | <b>0.002</b>             |
| >129                                    | 3.76         | (1.85 - 7.63)           | <b>&lt;0.001</b>         |
| Baseline DBP, mmHg (reference: <70)     |              |                         | 0.14 <sup>†</sup>        |
| 70-79                                   | 1.26         | (1.03 - 1.55)           | <b>0.03</b>              |
| 80-89                                   | 1.18         | (0.91 - 1.54)           | 0.21                     |
| 90-119                                  | 1.31         | (0.78 - 2.18)           | 0.31                     |
| Ibrutinib dose, mg (560/840 vs 280/480) | 0.84         | (0.63 - 1.12)           | 0.24                     |

Abbreviations: ASA, aspirin; BMI, body-mass-index; CAD, coronary artery disease; CHF, congestive heart failure; CKD, chronic kidney disease; CLL, chronic lymphocytic lymphoma; CVA, cerebrovascular accident; CV, cardiovascular; CY3PA4, cytochrome P450, family 3, subfamily A; DBP, diastolic blood pressure; DM, diabetes mellitus; ECOG, Eastern Cooperative Oncology Group; MI, myocardial infarction; MCL, mantle cell lymphoma; N/A, not available; SNRI, serotonin and norepinephrine reuptake inhibitors; WM, Waldenström's macroglobulemia. \*Considered as a continuous variable. <sup>†</sup>Omnibus p-value (reflects overall variable effect). <sup>‡</sup>Diffuse large B-Cell lymphoma, follicular lymphoma, hairy cell leukemia, graft-versus-host disease, marginal zone lymphoma, and Waldenström's macroglobulemia.

**Supplemental Table 3B.** Multivariable predictors for new hypertension alone (n=215).\*

| Variable                                   | Hazard Ratio | 95% Confidence Interval | p-value                 |
|--------------------------------------------|--------------|-------------------------|-------------------------|
| Age**                                      | 1.00         | (0.98 – 1.02)           | 0.90                    |
| BMI**                                      | 1.00         | (0.97 – 1.04)           | 0.88                    |
| Male                                       | 1.17         | (0.81 – 1.68)           | 0.41                    |
| Black/African-American                     | 1.36         | (0.33 – 5.67)           | 0.67                    |
| History of DM                              | 1.73         | (1.03 – 2.93)           | <b>0.04</b>             |
| History of CKD                             | 0.86         | (0.52 – 1.42)           | 0.56                    |
| Smoking Status: Current/Previous vs. Never | 0.94         | (0.65 – 1.34)           | 0.72                    |
| Baseline SBP, mmHg                         |              |                         | <b>0.02<sup>†</sup></b> |
| <100                                       | reference    | reference               |                         |
| 100-119                                    | 3.05         | (1.41 – 6.58)           | <b>0.004</b>            |
| 120-129                                    | 3.24         | (1.46 – 7.17)           | <b>0.004</b>            |
| >129 <sup>‡</sup>                          | 3.98         | (1.54 – 10.26)          | <b>0.004</b>            |

Abbreviations: BMI, body-mass-index; CKD, chronic kidney disease; DM, diabetes mellitus; SBP, systolic blood pressure. \*Reflects inclusion of variables with univariable association with new hypertension during ibrutinib use and/or established traditional hypertension risk factors. \*\*Considered as continuous variables. <sup>†</sup>Omnibus p-value (reflects overall variable effect). <sup>‡</sup>Subjects without a formal diagnosis of hypertension and not on antihypertensive therapy.

**Supplemental Table 3C.** Multivariable predictors for worsened hypertension alone (n=347).\*

| Variable                                   | Hazard Ratio | 95% Confidence Interval | p-value           |
|--------------------------------------------|--------------|-------------------------|-------------------|
| Age**                                      | 1.02         | (1.00 – 1.03)           | <b>0.01</b>       |
| BMI**                                      | 1.03         | (1.00 – 1.05)           | <b>0.04</b>       |
| Male                                       | 0.92         | (0.71 – 1.20)           | 0.55              |
| Black/African-American                     | 0.73         | (0.42 – 1.28)           | 0.28              |
| History of DM                              | 1.07         | (0.77 – 1.49)           | 0.68              |
| History of CKD                             | 0.95         | (0.71 – 1.27)           | 0.72              |
| Smoking Status: Current/Previous vs. Never | 1.12         | (0.88 – 1.42)           | 0.37              |
| Primary malignancy                         |              |                         | <b>0.01†</b>      |
| CLL vs. MCL                                | 0.97         | (0.63 – 1.53)           | 0.93              |
| CLL vs. Other‡                             | 1.84         | (1.23 – 2.75)           | <b>0.003</b>      |
| MCL vs. Other‡                             | 1.20         | (1.06 – 3.31)           | <b>0.03</b>       |
| CY3PA4 Inhibitor                           | 2.83         | (1.80 – 4.45)           | <b>&lt;0.001</b>  |
| Baseline SBP                               |              |                         | <b>&lt;0.001†</b> |
| <120                                       | reference    | reference               |                   |
| 120-129                                    | 0.61         | (0.38 – 0.99)           | <b>0.04</b>       |
| 130-139                                    | 0.97         | (0.65 – 1.46)           | 0.89              |
| >139                                       | 0.43         | (0.29 – 0.63)           | <b>&lt;0.001</b>  |

Abbreviations: BMI, body-mass-index; CKD, chronic kidney disease; CLL, chronic lymphocytic lymphoma; CY3PA4, cytochrome P450, family 3, subfamily A; DM, diabetes mellitus; MCL, mantle cell lymphoma; SBP, systolic blood pressure; WM, Waldenström’s macroglobulemia. \*Reflects variables with univariate association with new hypertension during ibrutinib use and/or established traditional hypertension risk factors. \*\*Considered as continuous variables. †Omnibus p-value (reflects overall variable effect). ‡Diffuse large B-Cell lymphoma, follicular lymphoma, hairy cell leukemia, graft-versus-host disease, marginal zone lymphoma, and Waldenström’s macroglobulemia.

**Supplemental Table 4A.** Prevention of worsening hypertension (HTN) among ibrutinib users, by antihypertensive therapeutic class (n=347).\*

| Variable                   | Hazard Ratio | 95% CI (lower - upper) | p-value |
|----------------------------|--------------|------------------------|---------|
| Beta-blocker               | 1.12         | (0.88 - 1.43)          | 0.36    |
| ACE inhibitor/ARB          | 0.90         | (0.66 - 1.23)          | 0.50    |
| Calcium channel blocker    | 1.20         | (0.94 - 1.53)          | 0.14    |
| Diuretic†                  | 0.88         | (0.67 - 1.15)          | 0.34    |
| Other anti-HTN medication‡ | 1.18         | (0.81 - 1.70)          | 0.39    |

Abbreviations: ACE, angiotensin converting enzyme inhibitor; ARB, angiotensin receptor blocker; CI, confidence interval. \*Univariate analyses, as no significant associations were noted. †Includes loop, thiazide, and potassium-sparing diuretics. ‡Clonidine, hydralazine, nitrates, and alpha-1 antagonists.

**Supplemental Table 4B.** Change in blood pressure during the 1<sup>st</sup> year of ibrutinib therapy, among subjects requiring the addition of only a single new or additional antihypertensive class. No class significantly lowered pressures. [From the 209 patients started on a new or additional antihypertensive, 101 patients saw the addition within 12 months of ibrutinib initiation, of which 64 were treated with the addition of a single antihypertension drug, 37 had pre and post antihypertensive blood pressure measures; another 24 (out of 34) required initiation of  $\geq 2$  antihypertensives, and had available blood pressure measures pre and 12 months post initiation of the first antihypertensive added during ibrutinib use].

| Medication Class        | No. with single-class therapy added (n = 37, %) | Change in SBP, mmHg (Post – Pre), mean (SD) |
|-------------------------|-------------------------------------------------|---------------------------------------------|
| ACE/ARB                 | 9 (24.3)                                        | +1.2 (16.8)                                 |
| Beta Blocker            | 9 (24.3)                                        | +1.5 (13.4)                                 |
| Calcium Channel Blocker | 9 (24.3)                                        | +2.0 (19.3)                                 |
| Diuretic*               | 10 (27.0)                                       | -0.3 (21.2)                                 |
| Other†                  | 0                                               | n/a                                         |
| Overall                 | 37 (100)                                        | +1.0 (17.3)                                 |
| Combination‡            | 24 (n/a)                                        | -6.0 (17.0)                                 |

Abbreviations: ACE, angiotensin converting enzyme inhibitor; ARB, angiotensin receptor blocker; HTN, hypertension; SBP, systolic blood pressure. \*Includes loop, thiazide, and potassium-sparing diuretics. †Clonidine, hydralazine, nitrates, and alpha-1 antagonists. ‡Subjects requiring  $\geq 2$  antihypertensives to be initiated during ibrutinib use.

**Supplemental Table 5.** Occurrence of major adverse cardiovascular events (MACE), by post-ibrutinib initiation hypertension (HTN) status.

| Final status                          | No or Stable HTN (n=122), % | New or Worsened HTN (n=440), % |
|---------------------------------------|-----------------------------|--------------------------------|
| MACE                                  | 9 (7.4)                     | 84 (19.1)                      |
| Cumulative incidence of MACE (95% CI) |                             |                                |
| Months post-ibrutinib initiation      | No or Stable HTN (n=122), % | New or Worsened HTN (n=440), % |
| 3                                     | 4.1 (1.5 - 8.7)             | 4.8 (3.1 - 7.1)                |
| 6                                     | 5.8 (2.6 - 11.0)            | 6.4 (4.3 - 8.9)                |
| 12                                    | 5.8 (2.6 - 11.0)            | 8.0 (5.7 - 10.7)               |

| Final status                         | No or Stable HTN (n=122), % | New or Worsened HTN (n=440), % |
|--------------------------------------|-----------------------------|--------------------------------|
| 24                                   | 6.7 (3.1 - 12.1)            | 12.2 (9.3 - 15.4)              |
| 36                                   | 6.7 (3.1 - 12.1)            | 14.2 (11.1 - 17.6)             |
| Median (IQR) follow-up time, months* |                             |                                |
| Group                                | No or Stable HTN (n=122), % | New or Worsened HTN (n=440), % |
| All patients                         | 4.9 (1.5 - 24.1)            | 27.8 (10.2 - 46.9)             |
| No MACE                              | 5.7 (1.6 - 25.2)            | 30.9 (12.0 - 49.0)             |

Abbreviations: CI, confidence interval; IQR, interquartile range. \*Reflects censoring at the time of MACE, death, or ibrutinib discontinuation for any reason.

**Supplemental Table 6A.** Multivariable analysis for the development of atrial fibrillation (AF) or ventricular arrhythmias (VA) during ibrutinib use (competing risks: death or ibrutinib discontinuation), considering new or worsened HTN at any time point.

| Variable                              | Hazard Ratio | 95% CI (lower - upper) | p-value          |
|---------------------------------------|--------------|------------------------|------------------|
| New/Worsened HTN versus No/Stable HTN | 3.18         | (1.37, 7.37)           | <b>0.01</b>      |
| Age†                                  | 1.05         | (1.02-1.07)            | <b>&lt;0.001</b> |
| BMI†                                  | 1.01         | (0.97-1.05)            | 0.69             |
| Male                                  | 2.09         | (1.17-3.75)            | <b>0.01</b>      |
| Prior AF                              | 0.79         | (0.26-2.45)            | 0.68             |
| Prior DM                              | 1.17         | (0.61-2.23)            | 0.64             |
| Prior MI                              | 1.43         | (0.66-3.11)            | 0.36             |
| Prior CHF                             | 1.96         | (0.87-4.42)            | 0.10             |

Abbreviations: AF, atrial fibrillation; BMI, body-mass-index; CHF, congestive heart failure; CI, confidence interval; DM, diabetes mellitus; HTN, hypertension; MI, myocardial infarction. \*Time varying covariate, where new/worsened HTN was considered only from the date/time of the initial new/worsened HTN event through the end of follow-up. †Considered as a continuous variable.

**Supplemental Table 6B.** Multivariable analysis for the development of atrial fibrillation (AF) or ventricular arrhythmias (VA) during ibrutinib use (competing risks: death or ibrutinib discontinuation), considering patients as having new/worsened HTN only from the time of reaching clinical HTN thresholds.

| Variable                               | Hazard Ratio | 95% CI (lower - upper) | p-value     |
|----------------------------------------|--------------|------------------------|-------------|
| New/Worsened HTN versus No/Stable HTN* | 5.35         | (2.94-9.73)            | <0.001      |
| Age†                                   | 1.05         | (1.02-1.07)            | <0.001      |
| BMI†                                   | 1.01         | (0.96-1.05)            | 0.79        |
| Male                                   | 2.12         | (1.19-3.76)            | <b>0.01</b> |
| Prior AF                               | 1.02         | (0.34-3.09)            | 0.97        |
| Prior DM                               | 1.13         | (0.59-2.15)            | 0.72        |
| Prior MI                               | 1.65         | (0.77-3.53)            | 0.20        |
| Prior CHF                              | 2.01         | (0.89-4.53)            | 0.09        |

Abbreviations: AF, atrial fibrillation; BMI, body-mass-index; CHF, congestive heart failure; CI, confidence interval; DM, diabetes mellitus; HTN, hypertension; MI, myocardial infarction. \*Time varying covariate, where new/worsened HTN was considered only from the date/time of the initial new/worsened HTN event through the end of follow-up. †Considered as a continuous variable.

### Supplemental Table 6C. Multivariable predictors of major adverse cardiovascular events

(MACE) during ibrutinib use, with HTN considered as a time varying covariate (n=562).\*

| Variable                                | Hazard Ratio | 95% CI (lower - upper) | p-value      |
|-----------------------------------------|--------------|------------------------|--------------|
| New/Worsened HTN versus No/Stable HTN** | 5.40         | (3.13-9.32)            | <0.001       |
| Age†                                    | 1.05         | (1.03-1.07)            | <0.001       |
| BMI†                                    | 1.03         | (0.99-1.07)            | 0.18         |
| Male                                    | 1.80         | (1.06-3.05)            | <b>0.03</b>  |
| Prior AF                                | 0.77         | (0.25-2.38)            | 0.65         |
| Prior CAD                               | 1.38         | (0.78-2.43)            | 0.27         |
| Prior CHF                               | 2.73         | (1.44-5.19)            | <b>0.002</b> |
| Prior CVE                               | 0.98         | (0.39-2.47)            | 0.96         |
| Prior DM                                | 1.17         | (0.67-2.06)            | 0.58         |
| Prior CKD                               | 1.07         | (0.65-1.77)            | 0.79         |

Abbreviations: AF, atrial fibrillation; BMI, body-mass-index; CAD, coronary artery disease; CHF, congestive heart failure; CI, confidence interval; CKD, chronic kidney disease; CVE, cerebrovascular accident; DM, diabetes mellitus; HTN, hypertension. \*MACE includes the combined outcome of AF, CHF, CVA, MI (myocardial infarction), VF/VT (ventricular fibrillation/ventricular tachycardia), and cardiovascular death during ibrutinib use. \*\*Patients considered no/stable HTN until the date/time of new/worsened HTN event, and then were considered as new/worsened HTN from the date of HTN development or worsening for the remainder of time at risk for MACE. †Considered as a continuous variable.

**Supplemental Table 7A.** Effect of antihypertensive therapy initiation on the subsequent risk of major adverse cardiovascular events (MACE) during ibrutinib use, among patients with new or worsened HTN alone (n=440).\*

| Variable                                                    | Hazard Ratio | 95% CI (lower - upper) | p-value          |
|-------------------------------------------------------------|--------------|------------------------|------------------|
| New anti-HTN medication versus No (new) anti-HTN medication | 0.40         | (0.24-0.66)            | <b>&lt;0.001</b> |
| Age†                                                        | 1.04         | (1.02-1.06)            | <b>&lt;0.001</b> |
| BMI†                                                        | 1.03         | (0.99-1.07)            | 0.08             |
| Male                                                        | 1.66         | (0.91-3.03)            | 0.10             |
| History of AF                                               | 0.62         | (0.18-2.11)            | 0.45             |
| Prior CAD                                                   | 1.07         | (0.55-2.11)            | 0.84             |
| Prior CHF                                                   | 2.78         | (1.40-5.53)            | <b>0.004</b>     |
| Prior CVE                                                   | 0.76         | (0.23-2.44)            | 0.64             |
| Prior DM                                                    | 1.46         | (0.81-2.64)            | 0.21             |
| Prior CKD                                                   | 1.17         | (0.68-2.01)            | 0.58             |

Abbreviations: AF, atrial fibrillation; BMI, body-mass-index; CAD, coronary artery disease; CHF, congestive heart failure; CI, confidence interval; CKD, chronic kidney disease; CVE, cerebrovascular accident; DM, diabetes mellitus; HTN, hypertension. \*MACE includes the combined outcome of AF, CHF, CVA, MI (myocardial infarction), VF/VT (ventricular fibrillation/ventricular tachycardia), and cardiovascular death during ibrutinib use. \*\*Patients considered as having a new antihypertensive initiated only if treatment was started prior to an arrhythmic event; those starting antihypertensives only after MACE [40 (19.8%) of the 202 subjects started on a new antihypertensive in this cohort] were included among the “no antihypertensive” group for this analysis. †Considered as a continuous variable.

**Supplemental Table 7B.** Effect of antihypertensive therapy initiation on the subsequent risk of major adverse cardiovascular events (MACE) during ibrutinib use, among patients with new or worsened HTN, excluding those with new beta-blocker or calcium channel inhibitor use (ie. atrioventricular node blockers; n=349).\*

| Variable                                                    | Hazard Ratio | 95% CI (lower - upper) | p-value          |
|-------------------------------------------------------------|--------------|------------------------|------------------|
| New anti-HTN medication versus No (new) anti-HTN medication | 0.52         | (0.27-1.01)            | 0.052            |
| Age†                                                        | 1.05         | (1.02-1.07)            | <b>&lt;0.001</b> |
| BMI†                                                        | 1.03         | (0.99-1.07)            | 0.11             |
| Male                                                        | 1.82         | (0.92-3.59)            | 0.09             |
| History of AF                                               | 0.56         | (0.14-2.20)            | 0.40             |
| Prior CAD                                                   | 0.98         | (0.48-2.03)            | 0.97             |
| Prior CHF                                                   | 2.52         | (1.16-5.49)            | <b>0.02</b>      |
| Prior CVE                                                   | 0.95         | (0.29-3.16)            | 0.94             |
| Prior DM                                                    | 1.35         | (0.71-2.56)            | 0.36             |



| Variable  | Hazard Ratio | 95% CI (lower - upper) | p-value |
|-----------|--------------|------------------------|---------|
| Prior CKD | 1.05         | (0.57-1.94)            | 0.87    |

Abbreviations: AF, atrial fibrillation; BMI, body-mass-index; CAD, coronary artery disease; CHF, congestive heart failure; CI, confidence interval; CKD, chronic kidney disease; CVE, cerebrovascular accident; DM, diabetes mellitus; HTN, hypertension. \*MACE includes the combined outcome of AF, CHF, CVA, MI (myocardial infarction), VF/VT (ventricular fibrillation/ventricular tachycardia), and cardiovascular death during ibrutinib use. \*\*Patients considered as having a new antihypertensive initiated only if treatment was started prior to an arrhythmic event; those starting antihypertensives only after MACE [37 (33.3%) of the 111 subjects started on a new antihypertensive in this cohort] were included among the “no antihypertensive” group for this analysis. †Considered as a continuous variable.

**Supplemental Table 8.** Cumulative incidence of new, predicted, and grade 3 or more HTN over time.

| Month:         | 0  | 3     | 6     | 9     | 12    |
|----------------|----|-------|-------|-------|-------|
| Observed       | 0% | 29.4% | 35.2% | 40.0% | 44.2% |
| Predicted      | 0% | 0.8%  | 1.7%  | 2.5%  | 3.4%  |
| Grade $\geq$ 3 | 0% | 1.3%  | 1.9%  | 2.6%  | 3.9%  |

**Supplemental Figure 1:** Study consort diagram. From a registry of all patients with hematologic malignancies treated with ibrutinib at a large comprehensive cancer center over a 7-year period, those with available blood pressure measures were included.

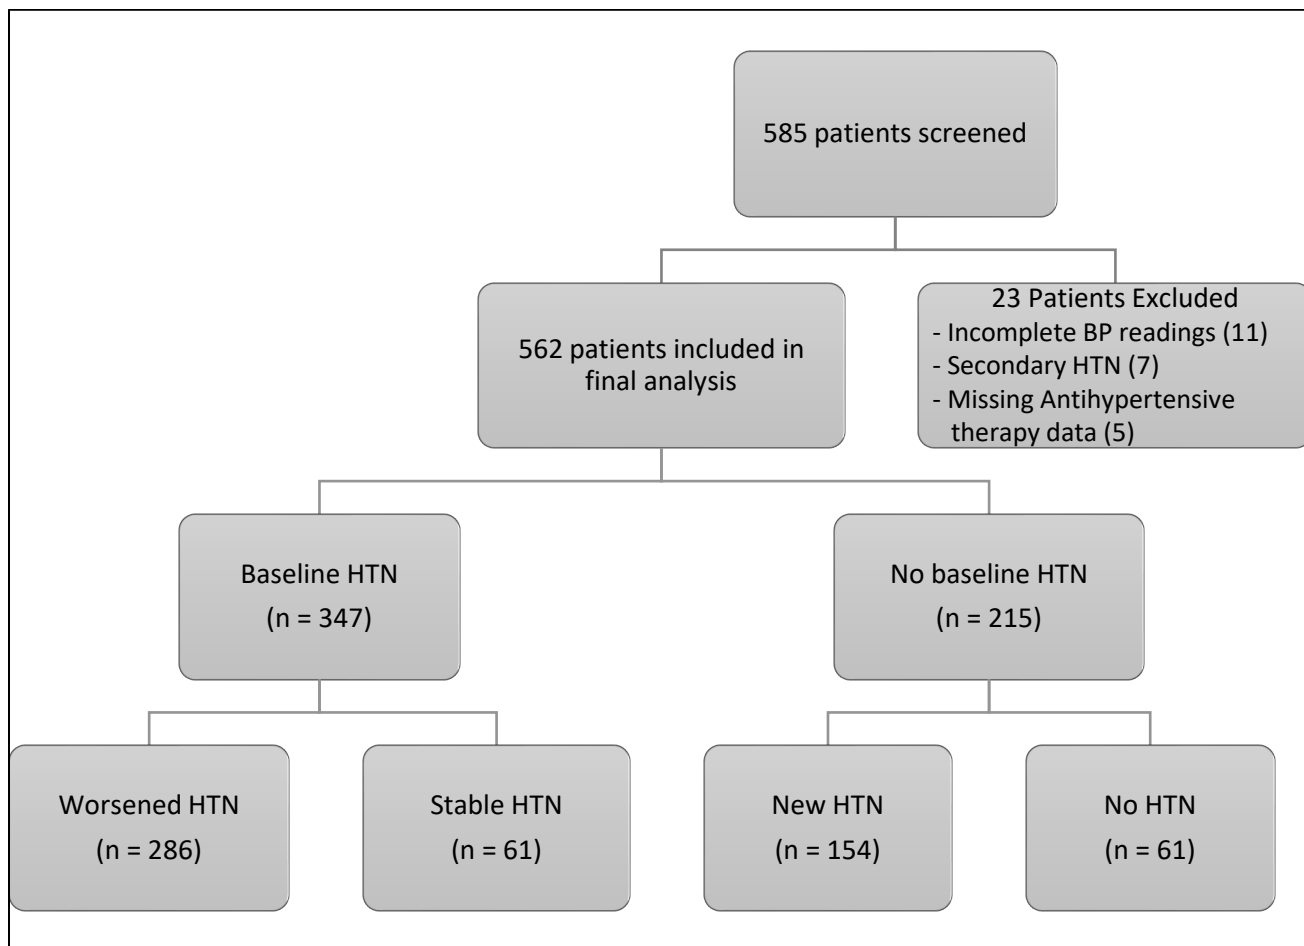

**Supplemental Figure 2.** Cumulative incidence of new or worsened hypertension (HTN), stratified by ibrutinib dose.

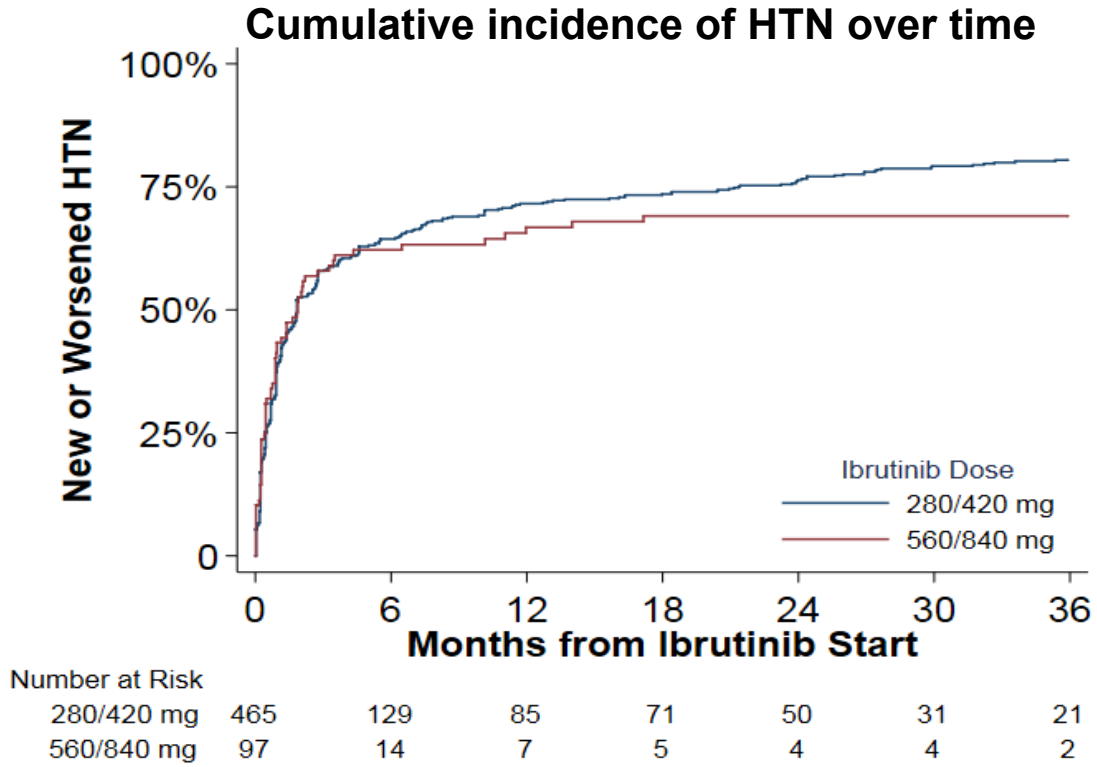

**Supplemental Figure 3.** Cumulative incidence of major adverse cardiovascular events (MACE), stratified by the degree of increase systolic blood pressure (SBP).

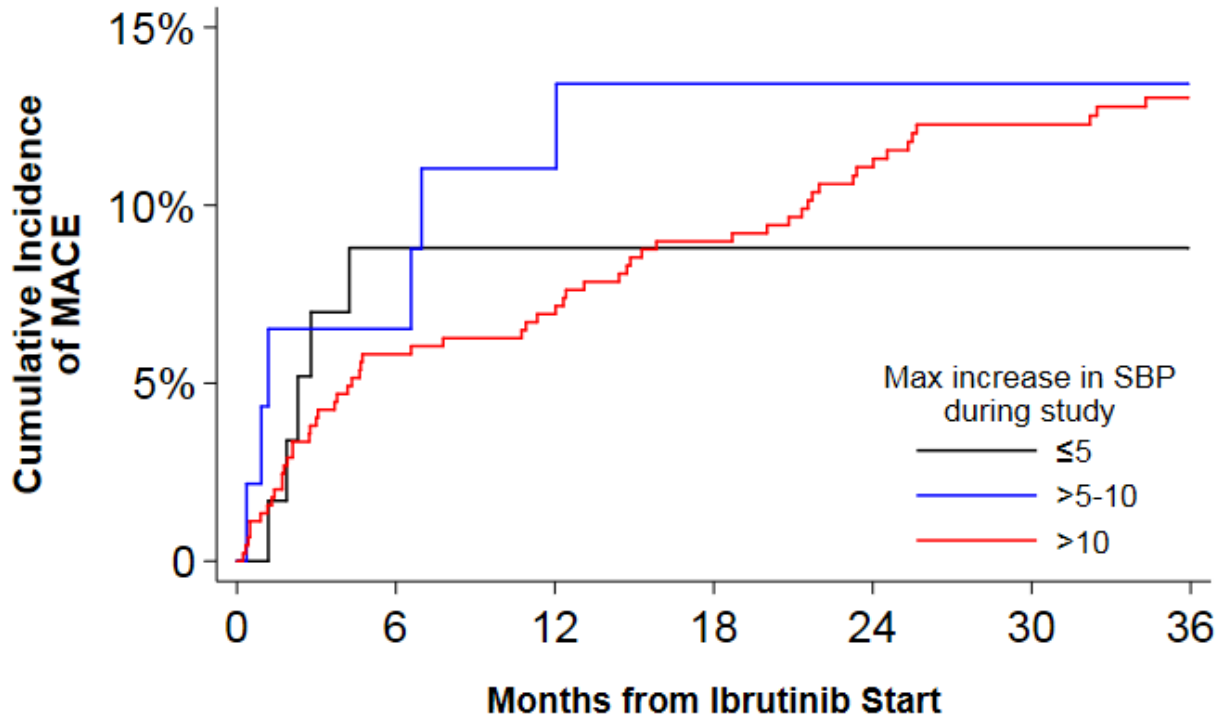

| Number at Risk |     | 0   | 6   | 12  | 18  | 24  | 30  | 36  |
|----------------|-----|-----|-----|-----|-----|-----|-----|-----|
| $\leq 5$       | 59  | 16  | 11  | 11  | 8   | 6   | 6   | 6   |
| $>5-10$        | 46  | 25  | 25  | 25  | 13  | 9   | 8   | 8   |
| $>10$          | 447 | 375 | 332 | 296 | 253 | 220 | 179 | 179 |

**Supplemental Figure 4.** Cumulative incidence of progression or death after the 12 month timepoint (ie. landmark) alone.

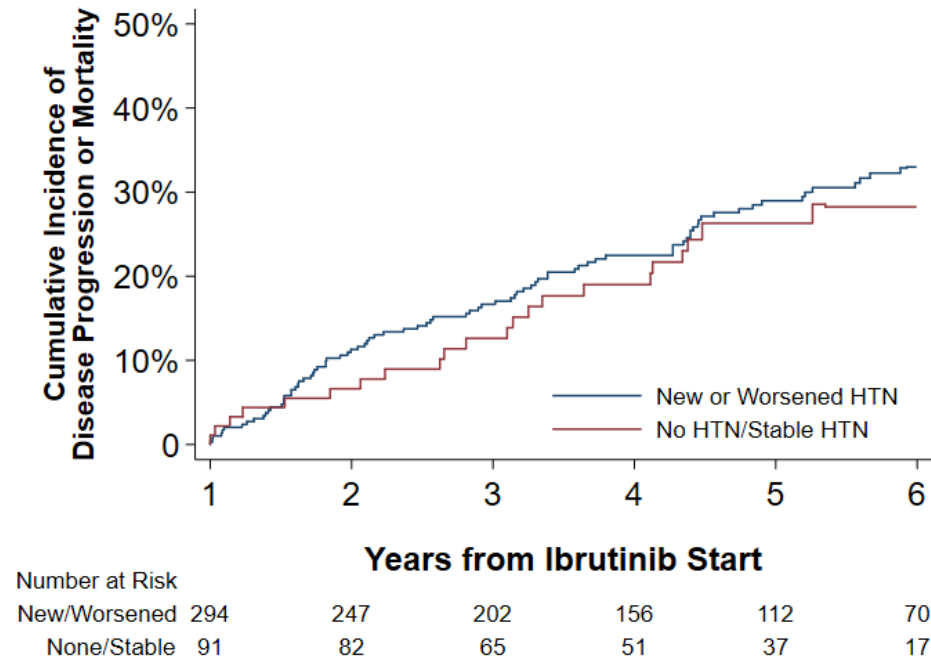

Supplement: bloodBLD2019000840-suppl1.pdf [file bloodBLD2019000840-suppl1.pdf]
